# Supplementary material
Source: publisher figshare collection journal article supplement (https://tandf.figshare.com/ndownloader/files/13599482)
Supplement: Supplementary file 1 [file 13599482]

**Appendix A**

**
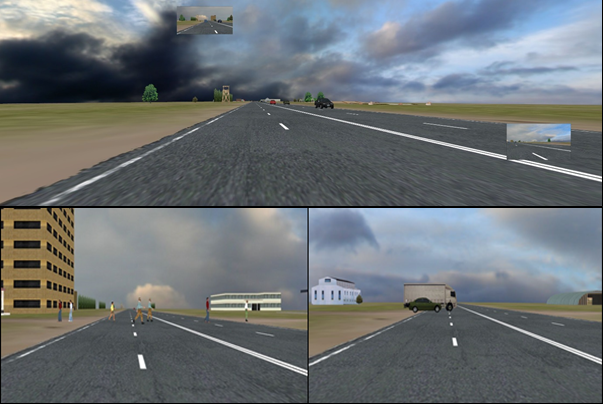
**

Figure I Illustration of scenario and the sudden events: Pedestrian crossing and road crossing by parked vehicles (Choudhary and Velaga, 2017c).

Table I Pairwise comparisons for pre-detection phase with respect to driving conditions.

| Driver Category | Driving Conditions | | Mean Difference (I-J) | S. E. | p-value | 95% Confidence Interval for Difference | |
| --- | --- | --- | --- | --- | --- | --- | --- |
| I | J | Lower Bound | Upper Bound |
| Professional | BL | ST | -1.73* | 0.30 | <0.001 | -2.49 | -0.98 |
| LT | -1.93* | 0.23 | <0.001 | -2.49 | -1.37 |
| ST | BL | 1.73* | 0.30 | <0.001 | 0.98 | 2.49 |
| LT | -0.20 | 0.31 | 1.00 | -0.97 | 0.58 |
| LT | BL | 1.93* | 0.23 | <0.001 | 1.37 | 2.49 |
| ST | 0.20 | 0.31 | 1.00 | -0.58 | 0.97 |
| Young | BL | ST | -1.70* | 0.30 | <0.001 | -2.44 | -0.97 |
| LT | -1.75* | 0.22 | <0.001 | -2.30 | -1.20 |
| ST | BL | 1.70* | 0.30 | <0.001 | 0.97 | 2.44 |
| LT | -0.05 | 0.31 | 1.00 | -0.80 | 0.71 |
| LT | BL | 1.75* | 0.22 | <0.001 | 1.20 | 2.30 |
| ST | 0.05 | 0.31 | 1.00 | -0.71 | 0.80 |

*Note: *. The mean difference is significant at 0.05 level; BL=Baseline; ST=Short text; LT=Long text; S.E.=Standard Error.*
